# Supplementary material for: A549 in-silico 1.0: A first computational model to simulate cell cycle dependent ion current modulation in the human lung adenocarcinoma
Source: PLoS Comput Biol. 2021 Jun 22;17(6):e1009091. doi: 10.1371/journal.pcbi.1009091 (PMC8219159; doi:10.1371/journal.pcbi.1009091)
Supplement: S1 Table — Rate constants for transitions between the states of all hidden Markov models. For calcium dependent transitions the calculated steady state calcium concentration Ca_i = 4.68 μM is used. (DOCX) [file pcbi.1009091.s003.docx]

**S1 Table. Parameters of hidden Markov models used in the A549 whole-cell current model.** Rate constants for transitions between the states of all hidden Markov models. For calcium dependent transitions the calculated steady state calcium concentration *Ca_i* = 4.68 µM is used.

| **Kv1.3 kinetic model** [1] | | **TASK-1 kinetic model** [2] | |
| --- | --- | --- | --- |
| ms-1 | ms-1 | ms-1 | ms-1 |
| ms-1 | ms-1 | ms-1 | ms-1 |
| ms-1 | ms-1 | **KCa1.1 kinetic model** [3] | |
| **Kv3.1 kinetic model** [4] | | ms-1 | ms-1 |
| ms-1 | ms-1 | ms-1 | ms-1 |
| ms-1 | ms-1 | ms-1 | ms-1 |
| **Kv3.4 kinetic model** [5] | | ms-1 | ms-1 |
| ms-1 | ms-1 | ms-1 | ms-1 |
| ms-1 | ms-1 | *d* = 200 mV | *b* = 36 mV |
| ms-1 | ms-1 | *kc*= 13.5 *Ca_rate* ms-1 | *ko* = 1.5*Ca_rate* ms-1 |
| **Kv7.1 kinetic model** [6] | | *Ca* = *Ca_i* *Ca_rate* ms-1 | *Ca_rate* = 1 µM-1ms-1 |
| ms-1 | ms-1 | **KCa3.1 kinetic model** [7] | |
| ms-1 | ms-1 | ms-1 | ms-1 |
| ms-1 | ms-1 | ms-1 | ms-1 |
| ms-1 | ms-1 | ms-1 | *Ca_i* = 4.68 µM |
| **CLC-2 kinetic model** [8] | | *b* = 20 ms-1 |
| ms-1 | ms-1 | **CRACM1 kinetic model** [9] | |
| ms-1 | s-1 | ms-1 | ms-1 |
| s-1 | ms-1 |

**Supporting References**

1. Hou P, Zhang R, Liu Y, Feng J, Wang W, Wu Y, et al. Physiological role of Kv1.3 channel in T lymphocyte cell investigated quantitatively by kinetic modeling. PLoS ONE. 2014;9: e89975. doi:10.1371/journal.pone.0089975

2. Limberg SH, Netter MF, Rolfes C, Rinné S, Schlichthörl G, Zuzarte M, et al. TASK-1 channels may modulate action potential duration of human atrial cardiomyocytes. Cell Physiol Biochem. 2011;28: 613–624. doi:10.1159/000335757

3. Wang W, Xiao F, Zeng X, Yao J, Yuchi M, Ding J. Optimal estimation of ion-channel kinetics from macroscopic currents. PLoS ONE. 2012;7: e35208. doi:10.1371/journal.pone.0035208

4. Wang W, Luo J, Hou P, Yang Y, Xiao F, Yuchi M, et al. Native gating behavior of ion channels in neurons with null-deviation modeling. PLoS ONE. 2013;8: e77105. doi:10.1371/journal.pone.0077105

5. Fineberg JD, Ritter DM, Covarrubias M. Modeling-independent elucidation of inactivation pathways in recombinant and native A-type Kv channels. J Gen Physiol. 2012;140: 513–527. doi:10.1085/jgp.201210869

6. Pusch M, Magrassi R, Wollnik B, Conti F. Activation and inactivation of homomeric KvLQT1 potassium channels. Biophys J. 1998;75: 785–792. doi:10.1016/S0006-3495(98)77568-X

7. Bailey MA, Grabe M, Devor DC. Characterization of the PCMBS-dependent modification of KCa3.1 channel gating. J Gen Physiol. 2010;136: 367–387. doi:10.1085/jgp.201010430

8. de Santiago JA, Nehrke K, Arreola J. Quantitative analysis of the voltage-dependent gating of mouse parotid ClC-2 chloride channel. J Gen Physiol. 2005;126: 591–603. doi:10.1085/jgp.200509310

9. Fomina AF, Fanger CM, Kozak JA, Cahalan MD. Single Channel Properties and Regulated Expression of Ca2+ Release-Activated Ca2+ (Crac) Channels in Human T Cells. J Cell Biol. 2000;150: 1435–1444. doi:10.1083/jcb.150.6.1435
